# Supplementary material for: Assessment of 2-Year Neurodevelopmental Outcomes in Extremely Preterm Infants Receiving Opioids and Benzodiazepines
Source: PubMed Central journal article supplement (PMC8264640; doi:10.1001/jamanetworkopen.2021.15998), 2021-07-07
Supplement: jamanetwopen-e2115998-s002.pdf [file jamanetwopen-e2115998-s002.pdf]

\*Indicates required information. Only first name, last name, and suffix will appear in PubMed.

| <b>*Group Name(s): PENUT Consortium</b>  |                   |                              |                  |                                   |                                          |                                                         |                                                                                            |
|------------------------------------------|-------------------|------------------------------|------------------|-----------------------------------|------------------------------------------|---------------------------------------------------------|--------------------------------------------------------------------------------------------|
| <b>*First Name and Middle Initial(s)</b> | <b>*Last Name</b> | <b>*Suffix (eg, Jr, III)</b> | Academic Degrees | Institution                       | Location (city, state/province, country) | Role or Contribution, eg, chair, principal investigator | Group (if more than 1 Group listed in the byline and/or Subgroup (eg, Steering Committee)) |
| Rajan                                    | Wadhawan          |                              | MD               | Advent Health for Children        | Orlando, Florida                         | PENUT Site PI                                           |                                                                                            |
| Sherry E.                                | Courtney          |                              | MD               | University of Arkansas for Med    | Little Rock, Arkansas                    | PENUT Site PI                                           |                                                                                            |
| Tonya                                    | Robinson          |                              | MD               | University of Louisville          | Louisville, Kentucky                     | PENUT Site PI                                           |                                                                                            |
| Kaashif A.                               | Ahmad             |                              | MD, MSc          | Methodist Children's Hospital     | San Antonio, Texas                       | PENUT Site PI                                           |                                                                                            |
| Ellen                                    | Bendel-Stenzel    |                              | MD               | Children's Minnesota              | Minneapolis, Minnesota                   | PENUT Site PI                                           |                                                                                            |
| Mariana                                  | Baserga           |                              | MD               | University of Utah                | Salt Lake City, Utah                     | PENUT Site PI                                           |                                                                                            |
| Edmund F.                                | LaGamma           |                              | MD               | Maria Fareri Children's Hospital  | Valhalla, New York                       | PENUT Site PI                                           |                                                                                            |
| L. Corbin                                | Downey            |                              | MD               | Wake Forest School of Medicine    | Winston-Salem, North Carolina            | PENUT Site PI                                           |                                                                                            |
| Raghavendra                              | Rao               |                              | MD               | University of Minnesota Mason     | Minneapolis, Minnesota                   | PENUT Site PI                                           |                                                                                            |
| Nancy                                    | Fahim             |                              | MD, MSc          | University of Minnesota Mason     | Minneapolis, Minnesota                   | PENUT Site PI                                           |                                                                                            |
| Andrea                                   | Lampland          |                              | MD               | Children's Minnesota              | St. Paul, Minnesota                      | PENUT Site PI                                           |                                                                                            |
| Ivan D.                                  | Frantz            | III                          | MD               | Beth Israel Deaconess Medical     | Boston, Massachusetts                    | PENUT Site PI                                           |                                                                                            |
| Janine                                   | Khan              |                              | MD               | Prentice Women's Hospital         | Chicago, Illinois                        | PENUT Site PI                                           |                                                                                            |
| Michael                                  | Weiss             |                              | MD               | University of Florida             | Gainesville, Florida                     | PENUT Site PI                                           |                                                                                            |
| Maureen M.                               | Gilmore           |                              | MD               | Johns Hopkins University          | Baltimore, Maryland                      | PENUT Site PI                                           |                                                                                            |
| Robin K.                                 | Ohls              |                              | MD               | University of New Mexico          | Albuquerque, New Mexico                  | PENUT Site PI                                           |                                                                                            |
| Jean                                     | Lowe              |                              | PhD              | University of New Mexico          | Albuquerque, New Mexico                  | PENUT Site PI                                           |                                                                                            |
| Nishant                                  | Srinivasan        |                              | MD               | Children's Hospital of the Univer | Chicago, Illinois                        | PENUT Site PI                                           |                                                                                            |
| Jorge E.                                 | Perez             |                              | MD               | South Miami Hospital              | South Miami, Florida                     | PENUT Site PI                                           |                                                                                            |
| Victor                                   | McKay             |                              | MD               | Johns Hopkins All Children's H    | St. Petersburg, Florida                  | PENUT Site PI                                           |                                                                                            |
